# Supplementary material
Source: PubMed Central journal article supplement (PMC4261968)
Supplement: gmb-37-683-s001.pdf [file gmb-37-683-s001.pdf]

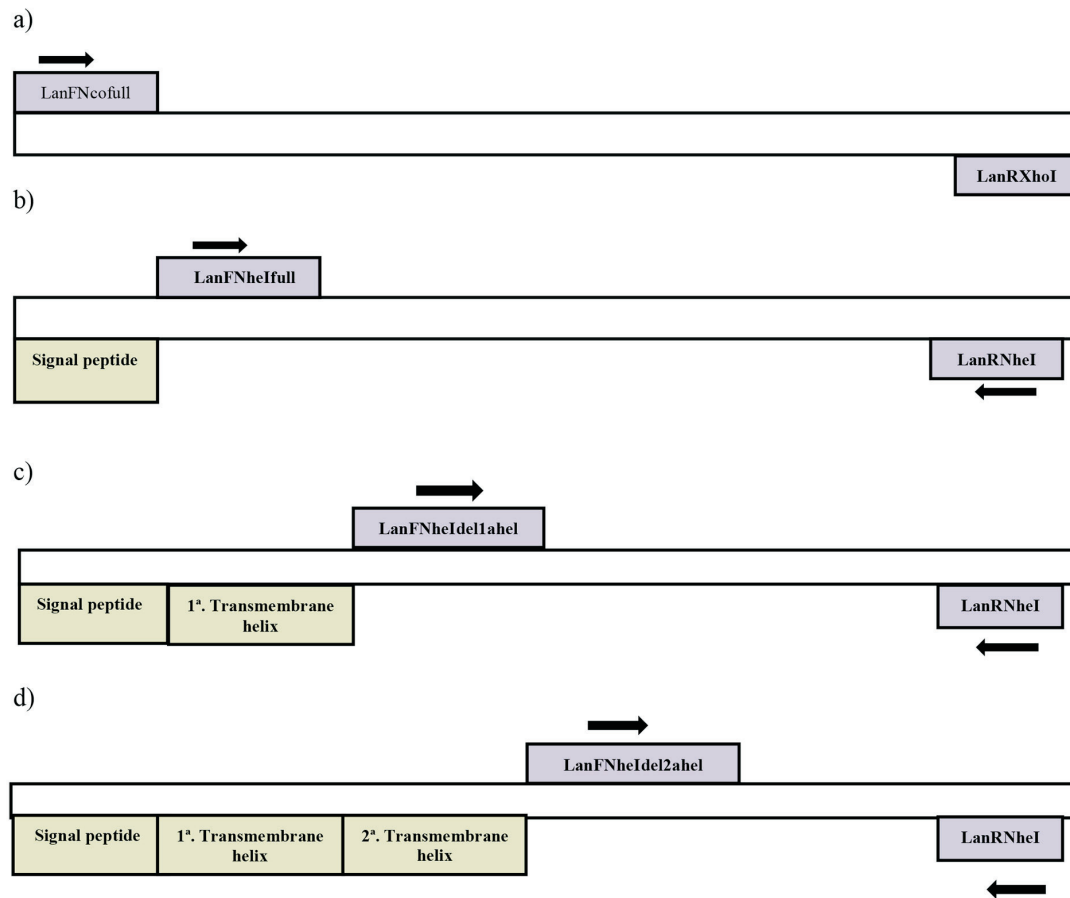

**Figure S1** - Schematic representation of the positions of the primers used to amplify the DNA sequences and lanosterol 14 $\alpha$  demethylase cDNA. (A) Primers LanFNcoIfull + LanRXhoI, (B) LanFNheIfull + LanRNheI, (C) LanFNheI del1ahel + LanRNheI and (D) LanFNheI del2ahel+ LanRNheI.
