# Supplementary material
Source: PubMed Central journal article supplement (PMC4261968)
Supplement: gmb-37-683-s002.pdf [file gmb-37-683-s002.pdf]

**ATGTCCACGTCGAAAACCTCAACGGTTC**TACTATACCCATAGTCAAAGAC  
M S H V E N L N G S T I P I V K D  
CTTGGCTGGCTATGTTGCTCAAGCCAGGAACCTTCTACTACGGGACTT  
L W S G Y V A Q A Q E L S T T R L  
CTCCTTCTCGCCGCATCAACCTT**CCTGTGATTGCCATTGTA****CTCAATGTT**  
L L L A A I N L P V I A I V L N V  
**CTCCG**CTCAAGTGCTTATCTCGCAACAATCTGAGCCTCCGGTGGTCTTT  
L R Q V L I P R N K S E P P V V F  
CATTGGTTACCTATCATA**GGCTCAGTGTTCATACGGCAATGACCC**TATC  
H W L P I I G S A V S Y G N D P I  
AATTTCTTTTCAAATGTCGTGAAAGTATGGCAACGTTTCACATTCAAT  
N F F F K C R E K Y G N V F T F I  
**CTCTTGGTCGTCGGCTCACTGTTC**CTGGGAGCCCAAGGCAATAATTTCT  
L F G R R V T V A L G A Q G N N F  
ATTCTTGGAGAAAATCGACTGTGTTCAAGCTGAGGAGGCATACACACAC  
I L G G K S T V F S A E E A Y T H  
CTCACCATCCCGTTTTTGGAAAGGATGTGGTTACGATGTGCCAACGAA  
L T T P V F G K D V V Y D V P N E  
GTTTTCATGGAACAGAAAAGTTTGTCAAAGTCGGTTTGTCTACGGAAAAC  
V F M E Q K K F V K V G L S T E N  
TTGGGAGCATACGTCGGCATGATTGAAGATGAAGTTTGGAAATTCATCGAG  
L R A Y V G M I E D E V V E F I E  
AATGATCCGACATTCAAAGTCTACCAGGACAACGATATAAACGAATGGGGT  
N D P T F K V Y Q D N D I N E W G  
TCATTGACGATTTGAAGATTTGGCTGAAATCACCATTCTTACCGCGTCG  
S F D V L K I L A E I T I L T A S  
AGAACTCTCAAGCCAGGATGTCAGGTGCAATCTCGATAAGAAGTTTGGC  
R T L Q G Q D V R S N L D K K F A  
CAGCTGTACAATGATCTGGACGGTGGTTTCACTCCCACTCACTTCTGTTC  
Q L Y N D L D G G F T P I N F L F  
CCCAACCTGCCTCTGAAAACATCTCGCAACCGCATGTTGCACAGAAGAAG  
P N L P L E N Y R K R D V A Q K K  
ATGAGCGAGTTCTTCAAAGTTCATCGAACAGCGAAGGCAAGGCCATTCA  
M S E F F Q S F I E Q R R Q G H S  
GACTATGACCAAGACATGATAGAAGTCTCATGGAACAGAAGTACCGCTCC  
D Y D Q D M I E A L M E Q K Y R S  
GGCAAGGGTTGAAGACCATGAAATGCCACATCATGATCGCTCTTCTC  
G K G L K D H E I A H I M I A L L  
ATGGCTGGTCAGCACACTAGTTCGGCAACCGGATCTGGGCTCTGCTTAC  
M A G Q H T S S A T G S W A L L H  
TTGGCCGACAATCCTGACATTGCCGAGGCTTGTACCAGGAACAAGTCAAG  
L A D N P D I A E A L Y Q E Q V K  
CACTTTAGCAATCCCAGCGCAGCTTCCGCTCTATGCTTATGAAGAGCTT  
H F S N P D G S F R S M S Y E E L  
AGAGAGCTCCCTGTTTGGACTCTGTCATCGGTGAGACCTTCGTGTACAT  
R E L P V L D S V I R E T L R V H  
CCTCCATCCACAGCATTATGCGATACGTCGGTACGATGTCCTCCGTTCTC  
P P I H S I M R Y V R D D V P V P  
CCCACACTTTCGGCTCCTTCAGAAGACCGGACATATATCGTTCCCAAGGGT  
P T L S A P S E D R T Y I V P K G  
CACTACGTAATGATCTCCCGCAGTCAGCCAGATGGATCTCTCATATGG  
H Y V L A S P A V S Q M D P L I W  
AGAAACCCAGAGAAGTGGGATCCTGCCGCTGGTCGGATCCTGAGGGTATT  
R N P E K W D P A R W S D P E G I  
GCTGCACAGGCCTTGAAGACCTACCTCGACGAGAACGGTGAAGAAGATCGAT  
A A Q A L K T Y V D E N G E K I D  
TACGGTTTCGGTGTGTCAGCAAAGGAACTGAGAGTCCCTATCAACCATTC  
Y G F G A V S K G T E S P Y Q P F  
GGTGTGGCAACATAGATGATTGGAGAACAGTTCGCTTACTTGAACATG  
G A G K H R C I G E Q F A Y L Q L  
GGTACCCTTCTGTCTACCTTGTTCGTAGAATGGAGTTGGCATCCCGACT  
G T L L S T F V R R M E L R I P T  
GGTGTGCCT**GCTCAGAACTACCATACCATGATTACGATGCC****AAAACGGCCT**  
G V P A Q N Y H T M I T M P K T F  
**AGACCTATTCCTACAGGAGACGC**AAGGCAAACTGA  
R R I H Y R R R K A N \*

**Figure S2** - Nucleotide sequence of the ERG11 gene of *M. perniciosa* and its corresponding amino acid sequence. Sequence regions marked in bold and underlined with double lines correspond to the regions used to design primers.
